# Supplementary material for: Interpreting a covid-19 test result
Source: HighWire-hosted journal article supplement (doi:10.1136/bmj.m1808), 2020-05-12
Supplement: watj056527.ww1.pdf [file watj056527.ww1.pdf]

## Definitions and formulae for calculating measures of test accuracy

2x2 table based on a pretest probability of 80%

| Accuracy Measure                | Definition                                                                                                                                                          | General table and formulae | Example: RT-PCT test for COVID-19 |
|---------------------------------|---------------------------------------------------------------------------------------------------------------------------------------------------------------------|----------------------------|-----------------------------------|
| True positives (TP)             | People with covid-19 who have a positive test result                                                                                                                | TP                         | 56                                |
| True negatives (TN)             | People without covid-19 who have a negative test result                                                                                                             | TN                         | 19                                |
| False positives (FP)            | People without covid-19 who have a positive test result                                                                                                             | FP                         | 1                                 |
| False negatives (FN)            | People with covid-19 who have a negative test result                                                                                                                | FN                         | 24                                |
| True positive rate (TPR):       | Sensitivity - Proportion of people with covid-19 who have a positive test result                                                                                    | $TP/(TP + FN)$             | $56/(56+24)=70\%$                 |
| True negative rate (TNR)        | Specificity - Proportion of people without covid-19 who have a negative test result                                                                                 | $TN/(FP+ TN)$              | $19/(19+1)=95\%$                  |
| False negative rate (FNR)       | Proportion of people with covid-19 who have negative test result                                                                                                    | $FN/(TP + FN)$             | $24/(56+24)=30\%$                 |
| False positive rate (FPR)       | Proportion of people without covid-19 who have positive test result                                                                                                 | $FP/(FP+ TN)$              | $1/(24+1)=5\%$                    |
| Positive predictive value (PPV) | Post-test probability that a person with a positive test result has covid-19                                                                                        | $TP/ (TP+FP)$              | $56/(56+1) = 98\%$                |
| Negative predictive value (NPV) | Post-test probability that a person with a negative test result does not have covid-19                                                                              | $TN/(FN+TN)$               | $19/(24 + 19) = 44\%$             |
| Likelihood ratio (LR)           | The proportion of people with covid-19 with a given test result (either positive or negative) divided by the proportion of people without COVID-19 with that result | LR(+) = TPR/FPR            | 0.70/ 0.05 = 14                   |
|                                 |                                                                                                                                                                     | LR(-) = FNR/TNR            | 0.30/0.95 = 0.32                  |
